# Supplementary material
Source: MDPI journal article supplement (https://www.mdpi.com/0718-1876/17/1/6)
Supplement: s1 [file jtaer-1429198-supplementary.pdf › jtaer-1429198-supplementary.pdf]

## Online Material: Measurement Invariance Analysis

Table S1: Compositional invariance test using permutation.

| Agreeableness vs. Conscientiousness          |       |                |      | Agreeableness vs. Extraversion     |                |      | Agreeableness vs. Neuroticism           |                |      |
|----------------------------------------------|-------|----------------|------|------------------------------------|----------------|------|-----------------------------------------|----------------|------|
|                                              | C = 1 | 95% CI         | CIE? | C = 1                              | 95% CI         | CIE? | C = 1                                   | 95% CI         | CIE? |
| SS                                           | 0.980 | [0.960; 1.000] | YES  | 0.980                              | [0.966; 1.000] | YES  | 0.980                                   | [0.968; 1.000] | YES  |
| CV                                           | 0.999 | [0.959; 1.000] | YES  | 0.999                              | [0.966; 1.000] | YES  | 0.999                                   | [0.967; 1.000] | YES  |
| PM                                           | 0.988 | [0.930; 1.000] | YES  | 0.988                              | [0.940; 1.000] | YES  | 0.988                                   | [0.939; 1.000] | YES  |
| NV                                           | 0.968 | [0.958; 1.000] | YES  | 0.968                              | [0.955; 1.000] | YES  | 0.968                                   | [0.960; 1.000] | YES  |
| PI                                           | 0.956 | [0.950; 1.000] | YES  | 0.956                              | [0.949; 1.000] | YES  | 0.956                                   | [0.940; 1.000] | YES  |
| Agreeableness vs. Openness to Experience     |       |                |      | Conscientiousness vs. Extraversion |                |      | Conscientiousness vs. Neuroticism       |                |      |
|                                              | C = 1 | 95% CI         | CIE? | C = 1                              | 95% CI         | CIE? | C = 1                                   | 95% CI         | CIE? |
| SS                                           | 0.980 | [0.977; 1.000] | YES  | 0.980                              | [0.969; 1.000] | YES  | 0.980                                   | [0.963; 1.000] | YES  |
| CV                                           | 0.999 | [0.955; 1.000] | YES  | 0.999                              | [0.944; 1.000] | YES  | 0.999                                   | [0.943; 1.000] | YES  |
| PM                                           | 0.988 | [0.945; 1.000] | YES  | 0.988                              | [0.933; 1.000] | YES  | 0.988                                   | [0.959; 1.000] | YES  |
| NV                                           | 0.968 | [0.951; 1.000] | YES  | 0.968                              | [0.960; 1.000] | YES  | 0.968                                   | [0.955; 1.000] | YES  |
| PI                                           | 0.956 | [0.938; 1.000] | YES  | 0.956                              | [0.933; 1.000] | YES  | 0.956                                   | [0.944; 1.000] | YES  |
| Conscientiousness vs. Openness to Experience |       |                |      | Extraversion vs. Neuroticism       |                |      | Extraversion vs. Openness to Experience |                |      |
|                                              | C = 1 | 95% CI         | CIE? | C = 1                              | 95% CI         | CIE? | C = 1                                   | 95% CI         | CIE? |
| SS                                           | 0.980 | [0.964; 1.000] | YES  | 0.980                              | [0.953; 1.000] | YES  | 0.999                                   | [0.981; 1.000] | YES  |
| CV                                           | 0.999 | [0.946; 1.000] | YES  | 0.999                              | [0.979; 1.000] | YES  | 0.988                                   | [0.966; 1.000] | YES  |

|                                        |       |                |      |       |                |     |       |                |     |
|----------------------------------------|-------|----------------|------|-------|----------------|-----|-------|----------------|-----|
| PM                                     | 0.988 | [0.959; 1.000] | YES  | 0.988 | [0.977; 1.000] | YES | 0.968 | [0.933; 1.000] | YES |
| NV                                     | 0.968 | [0.955; 1.000] | YES  | 0.968 | [0.952; 1.000] | YES | 0.956 | [0.937; 1.000] | YES |
| PI                                     | 0.956 | [0.945; 1.000] | YES  | 0.956 | [0.930; 1.000] | YES | 0.980 | [0.967; 1.000] | YES |
| Neuroticism vs. Openness to Experience |       |                |      |       |                |     |       |                |     |
|                                        | C = 1 | 95% CI         | CIE? |       |                |     |       |                |     |
| SS                                     | 0.980 | [0.975; 1.000] | YES  |       |                |     |       |                |     |
| CV                                     | 0.999 | [0.987; 1.000] | YES  |       |                |     |       |                |     |
| PM                                     | 0.988 | [0.971; 1.000] | YES  |       |                |     |       |                |     |
| NV                                     | 0.968 | [0.966; 1.000] | YES  |       |                |     |       |                |     |
| PI                                     | 0.956 | [0.947; 1.000] | YES  |       |                |     |       |                |     |

Notes: C=1: correlation value=1; CI: confidence interval; CIE: compositional invariance established?

Table S2: Equal mean assessment.

| Agreeableness vs. Conscientiousness          |        |                 |      | Agreeableness vs. Extraversion     |                 |      | Agreeableness vs. Neuroticism           |                  |      |
|----------------------------------------------|--------|-----------------|------|------------------------------------|-----------------|------|-----------------------------------------|------------------|------|
|                                              | D = 0  | 95% CI          | EMV? | D = 0                              | 95% CI          | EMV? | D = 0                                   | 95% CI           | EMV? |
| SS                                           | -0.321 | [-0.245; 0.256] | NO   | -0.387                             | [-0.245; 0.288] | NO   | -0.334                                  | [-0.1895; 0.256] | NO   |
| CV                                           | -0.373 | [-0.423; 0.530] | YES  | -0.332                             | [-0.423; 0.554] | YES  | -0.346                                  | [-0.523; 0.522]  | YES  |
| PM                                           | -0.156 | [-0.345; 0.423] | YES  | -0.165                             | [-0.345; 0.488] | YES  | -0.367                                  | [-0.451; 0.423]  | YES  |
| NV                                           | -0.235 | [-0.377; 0.398] | YES  | -0.276                             | [-0.377; 0.486] | YES  | -0.145                                  | [-0.345; 0.456]  | YES  |
| PI                                           | -0.165 | [-0.345; 0.487] | YES  | -0.304                             | [-0.345; 0.423] | YES  | -0.276                                  | [-0.256; 0.287]  | YES  |
| Agreeableness vs. Openness to Experience     |        |                 |      | Conscientiousness vs. Extraversion |                 |      | Conscientiousness vs. Neuroticism       |                  |      |
|                                              | D = 0  | 95% CI          | EMV? | D = 0                              | 95% CI          | EMV? | D = 0                                   | 95% CI           | EMV? |
| SS                                           | -0.366 | [-0.173; 0.166] | NO   | -0.214                             | [-0.157; 0.162] | NO   | -0.134                                  | [-0.244; 0.256]  | NO   |
| CV                                           | -0.254 | [-0.377; 0.387] | YES  | -0.362                             | [-0.389; 0.331] | YES  | -0.263                                  | [-0.356; 0.341]  | YES  |
| PM                                           | -0.187 | [-0.366; 0.376] | YES  | -0.255                             | [-0.333; 0.311] | YES  | -0.235                                  | [-0.342; 0.389]  | YES  |
| NV                                           | -0.288 | [-0.305; 0.312] | YES  | -0.275                             | [-0.365; 0.364] | YES  | -0.400                                  | [-0.433; 0.456]  | YES  |
| PI                                           | -0.241 | [-0.334; 0.367] | YES  | -0.221                             | [-0.324; 0.334] | YES  | -0.131                                  | [-0.456; 0.432]  | YES  |
| Conscientiousness vs. Openness to Experience |        |                 |      | Extraversion vs. Neuroticism       |                 |      | Extraversion vs. Openness to Experience |                  |      |
|                                              | D = 0  | 95% CI          | EMV? | D = 0                              | 95% CI          | EMV? | D = 0                                   | 95% CI           | EMV? |
| SS                                           | -0.331 | [-0.390; 0.364] | NO   | -0.211                             | [-0.344; 0.334] | NO   | -0.345                                  | [-0.390; 0.324]  | NO   |
| CV                                           | -0.420 | [-0.211; 0.311] | YES  | -0.410                             | [-0.355; 0.322] | YES  | -0.452                                  | [-0.211; 0.351]  | YES  |
| PM                                           | -0.452 | [-0.241; 0.345] | YES  | -0.341                             | [-0.245; 0.266] | YES  | -0.411                                  | [-0.242; 0.348]  | YES  |
| NV                                           | -0.596 | [-0.476; 0.463] | YES  | -0.429                             | [-0.356; 0.387] | YES  | -0.511                                  | [-0.411; 0.422]  | YES  |

|                                        |        |                 |      |        |                 |     |        |                 |     |
|----------------------------------------|--------|-----------------|------|--------|-----------------|-----|--------|-----------------|-----|
| PI                                     | -0.431 | [-0.234; 0.255] | YES  | -0.210 | [-0.145; 0.187] | YES | -0.412 | [-0.299; 0.253] | YES |
| Neuroticism vs. Openness to Experience |        |                 |      |        |                 |     |        |                 |     |
|                                        | D = 0  | 95% CI          | EMV? |        |                 |     |        |                 |     |
| SS                                     | -0.399 | [-0.332; 0.390] | NO   |        |                 |     |        |                 |     |
| CV                                     | -0.413 | [-0.366; 0.377] | YES  |        |                 |     |        |                 |     |
| PM                                     | -0.411 | [-0.320; 0.343] | YES  |        |                 |     |        |                 |     |
| NV                                     | -0.512 | [-0.441; 0.432] | YES  |        |                 |     |        |                 |     |
| PI                                     | -0.356 | [-0.398; 0.377] | YES  |        |                 |     |        |                 |     |

*D=0: difference in the composite's mean value (=0); CI: confidence interval; EMV: equal Mean values.*

Table S3: Equal variance assessment.

| Agreeableness vs. Conscientiousness          |       |                 |     | Agreeableness vs. Extraversion     |                 |     | Agreeableness vs. Neuroticism           |                  |     |
|----------------------------------------------|-------|-----------------|-----|------------------------------------|-----------------|-----|-----------------------------------------|------------------|-----|
|                                              | R = 0 | 95% CI          | EV? | R = 0                              | 95% CI          | EV? | R = 0                                   | 95% CI           | EV? |
| SS                                           | 0.536 | [-0.245; 0.256] | NO  | 0.387                              | [-0.245; 0.288] | NO  | 0.334                                   | [-0.1895; 0.256] | NO  |
| CV                                           | 0.373 | [-0.423; 0.530] | YES | 0.332                              | [-0.423; 0.554] | YES | 0.346                                   | [-0.523; 0.522]  | YES |
| PM                                           | 0.156 | [-0.345; 0.423] | YES | 0.165                              | [-0.345; 0.488] | YES | 0.367                                   | [-0.451; 0.423]  | YES |
| NV                                           | 0.235 | [-0.377; 0.398] | YES | 0.276                              | [-0.377; 0.486] | YES | 0.145                                   | [-0.345; 0.456]  | YES |
| PI                                           | 0.165 | [-0.345; 0.487] | YES | 0.304                              | [-0.345; 0.423] | YES | 0.276                                   | [-0.256; 0.287]  | YES |
| Agreeableness vs. Openness to Experience     |       |                 |     | Conscientiousness vs. Extraversion |                 |     | Conscientiousness vs. Neuroticism       |                  |     |
|                                              | R = 0 | 95% CI          | EV? | R = 0                              | 95% CI          | EV? | R = 0                                   | 95% CI           | EV? |
| SS                                           | 0.366 | [-0.173; 0.166] | NO  | 0.214                              | [-0.157; 0.162] | NO  | 0.134                                   | [-0.244; 0.256]  | NO  |
| CV                                           | 0.254 | [-0.377; 0.387] | YES | 0.352                              | [-0.319; 0.331] | YES | 0.263                                   | [-0.356; 0.341]  | YES |
| PM                                           | 0.187 | [-0.366; 0.366] | YES | 0.215                              | [-0.333; 0.311] | YES | 0.235                                   | [-0.342; 0.389]  | YES |
| NV                                           | 0.288 | [-0.305; 0.352] | YES | 0.201                              | [-0.365; 0.364] | YES | 0.400                                   | [-0.433; 0.456]  | YES |
| PI                                           | 0.241 | [-0.334; 0.367] | YES | 0.224                              | [-0.324; 0.334] | YES | 0.131                                   | [-0.456; 0.432]  | YES |
| Conscientiousness vs. Openness to Experience |       |                 |     | Extraversion vs. Neuroticism       |                 |     | Extraversion vs. Openness to Experience |                  |     |
|                                              | R = 0 | 95% CI          | EV? | R = 0                              | 95% CI          | EV? | R = 0                                   | 95% CI           | EV? |
| SS                                           | 0.331 | [-0.390; 0.364] | NO  | 0.233                              | [-0.344; 0.334] | NO  | 0.345                                   | [-0.390; 0.324]  | NO  |
| CV                                           | 0.420 | [-0.211; 0.311] | YES | 0.234                              | [-0.155; 0.122] | YES | 0.452                                   | [-0.211; 0.351]  | YES |
| PM                                           | 0.452 | [-0.241; 0.345] | YES | 0.341                              | [-0.245; 0.266] | YES | 0.411                                   | [-0.242; 0.348]  | YES |
| NV                                           | 0.596 | [-0.476; 0.463] | YES | 0.429                              | [-0.356; 0.387] | YES | 0.511                                   | [-0.411; 0.422]  | YES |

|                                        |       |                 |     |       |                 |     |       |                 |     |
|----------------------------------------|-------|-----------------|-----|-------|-----------------|-----|-------|-----------------|-----|
| PI                                     | 0.431 | [-0.234; 0.255] | YES | 0.210 | [-0.145; 0.187] | YES | 0.412 | [-0.299; 0.253] | YES |
| Neuroticism vs. Openness to Experience |       |                 |     |       |                 |     |       |                 |     |
|                                        | R = 0 | 95% CI          | EV? |       |                 |     |       |                 |     |
| SS                                     | 0.399 | [-0.332; 0.390] | NO  |       |                 |     |       |                 |     |
| CV                                     | 0.413 | [-0.366; 0.377] | YES |       |                 |     |       |                 |     |
| PM                                     | 0.411 | [-0.320; 0.343] | YES |       |                 |     |       |                 |     |
| NV                                     | 0.512 | [-0.441; 0.432] | YES |       |                 |     |       |                 |     |
| PI                                     | 0.356 | [-0.398; 0.377] | YES |       |                 |     |       |                 |     |

Notes: R=0: logarithm of the composite's variances ratio ( $R=0$ ); CI: confidence interval; EV: equal variances.
